# Supplementary material for: Impact of protein and small molecule interactions on kinase conformations
Source: eLife journal article supplement (doi:10.7554/elife.94755), 2024-02-20
Supplement: fig1-data2 [file elife-94755-fig1-data2-v1.pdf]

Indicated antibodies have been used (for details see the Materials and Methods section)

**Figure 1 Panel E:** KinCon-time course experiments:

In these panels western blots are shown. The corresponding western blot raw data is enclosed below:

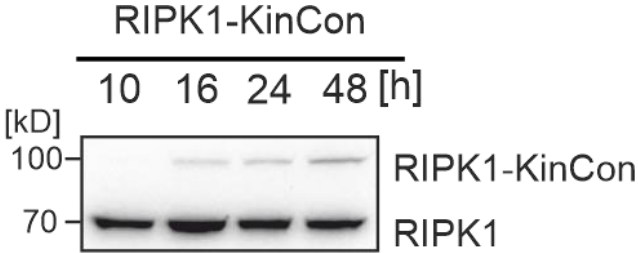

original marker picture

original western blot

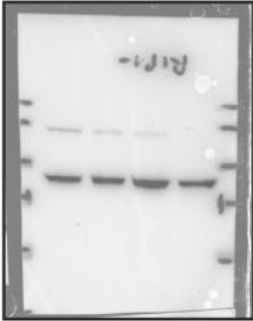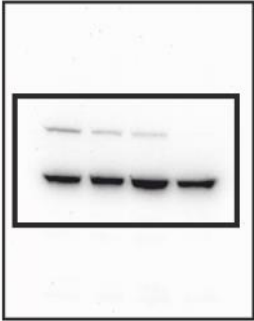

RIPK1

Blots were mirrored for figure

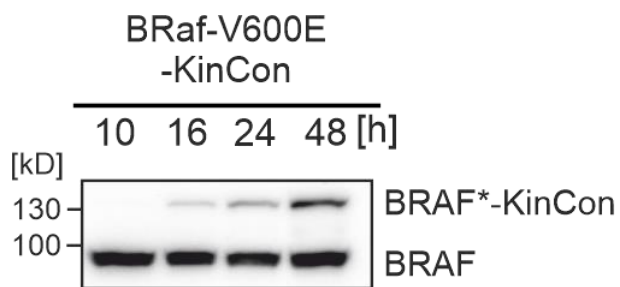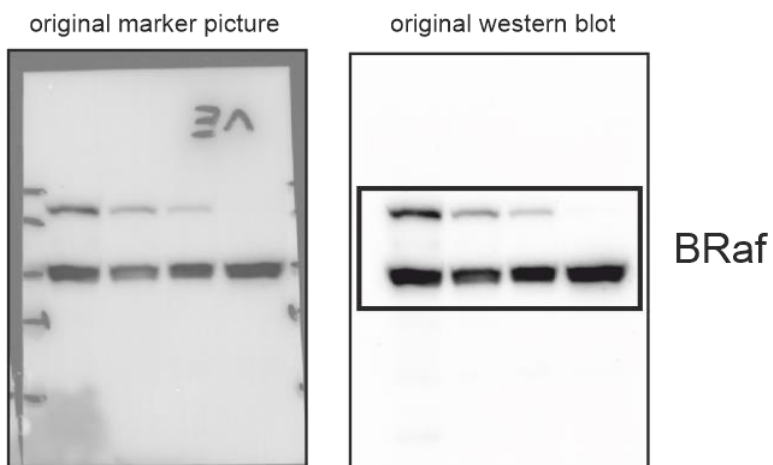

Blots were mirrored for figure

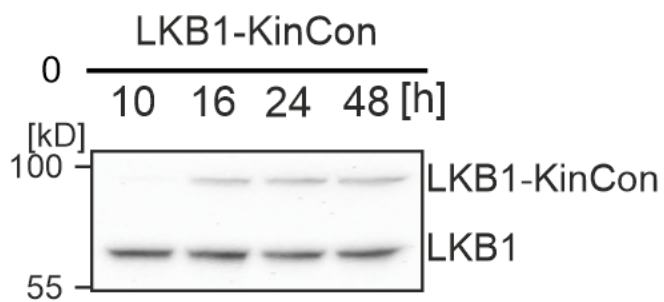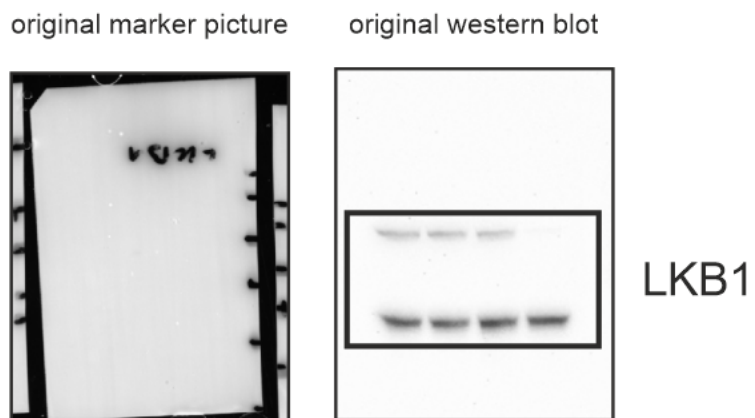

Blots were mirrored for figure

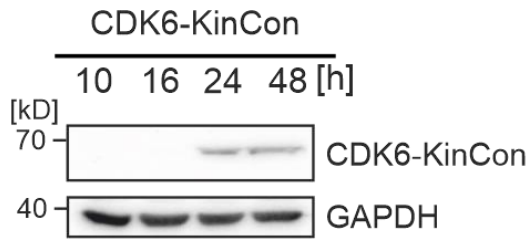

original marker picture

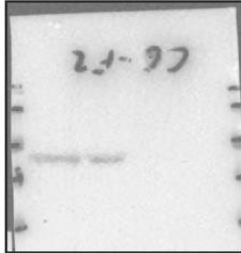

original western blot

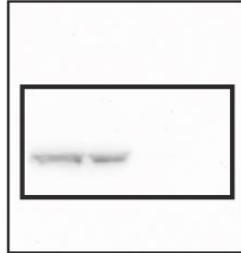

RLuc

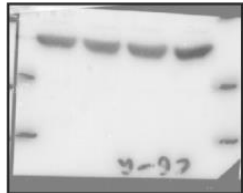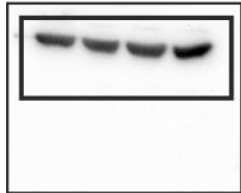

GAPDH

Blots were mirrored for figure

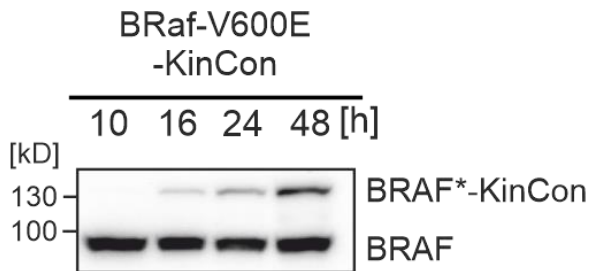

original marker picture

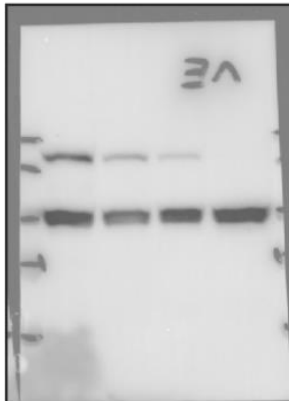

original western blot

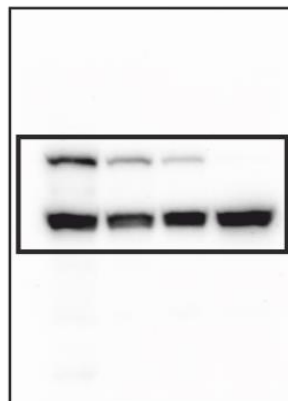

BRaf

Blots were mirrored for figure

**Figure 1 Panel F:** BRaf-PLX-KinCon-time course experiments:

In these panels western blots are shown. The corresponding western blot raw data is enclosed below :

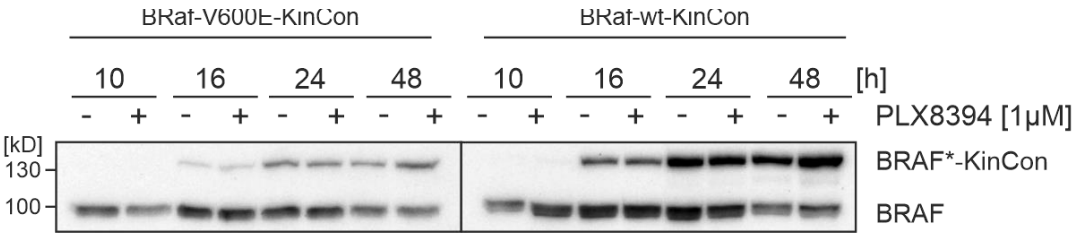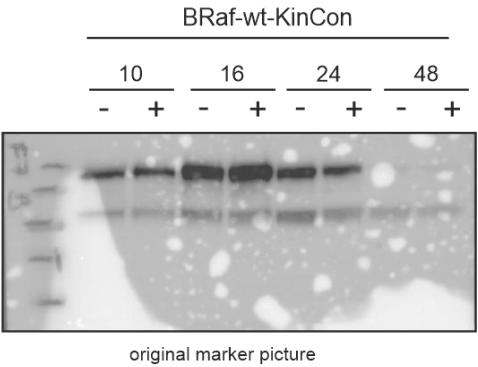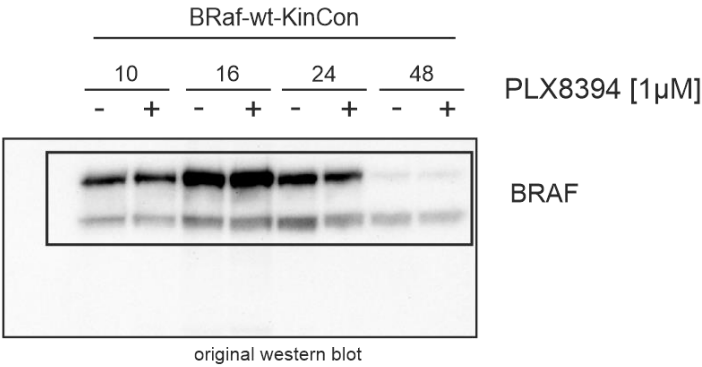

Blots were mirrored for figure

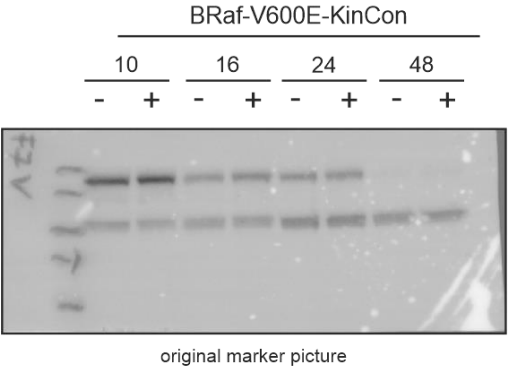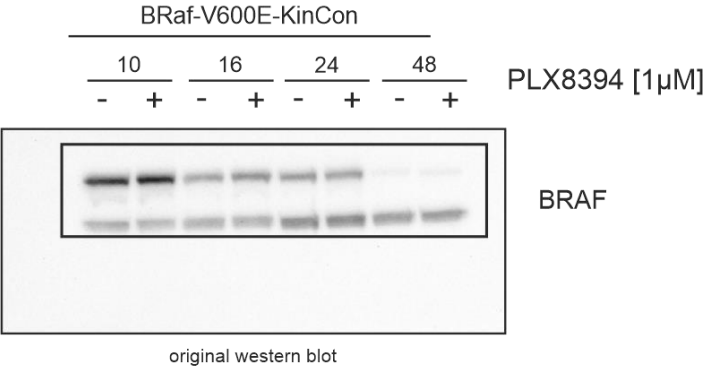

Blots were mirrored for figure
