# Supplementary material for: Impact of protein and small molecule interactions on kinase conformations
Source: eLife journal article supplement (doi:10.7554/elife.94755), 2024-02-20
Supplement: fig2-data2 [file elife-94755-fig2-data2-v1.pdf]

Indicated antibodies have been used (for details see the Materials and Methods section)

**Figure 2 Panel D:** Impact of LKB1-STRADa-MO25 co-expression of pAMPK/AMPK phosphorylation pattern.

In this panel a representative western blot is shown. The corresponding western blot raw data is enclosed blow:

**Replicate 1:**

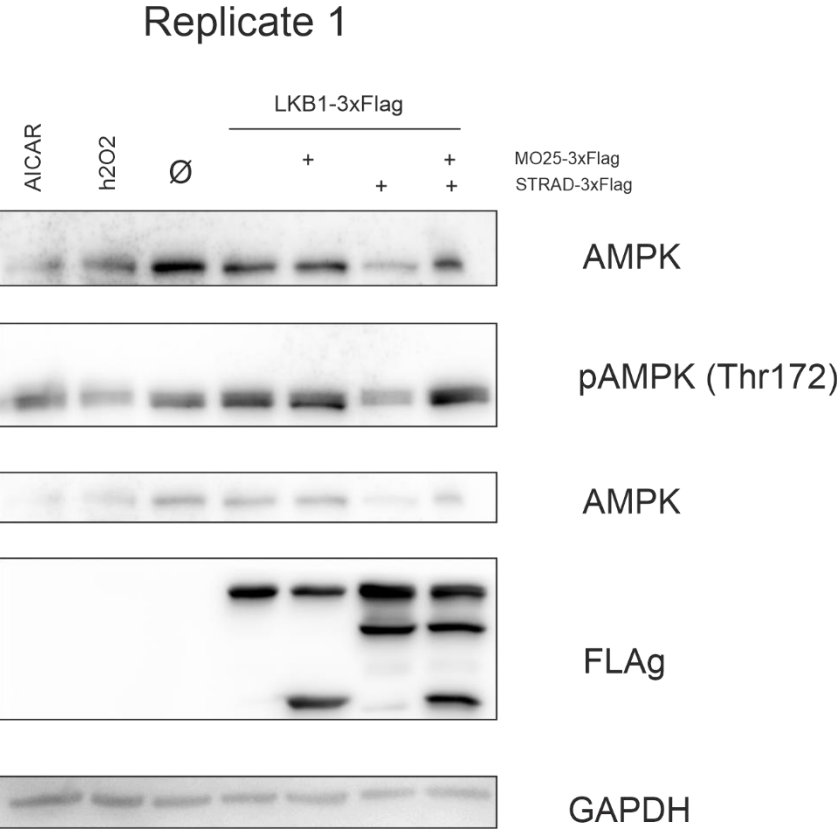

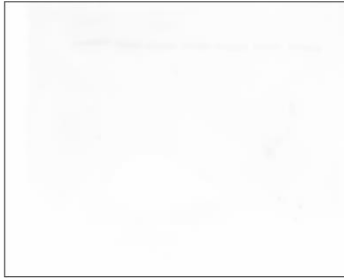

original western blot  
GAPDH

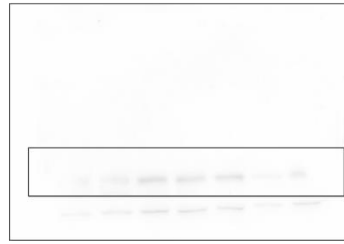

original western blot

AMPK

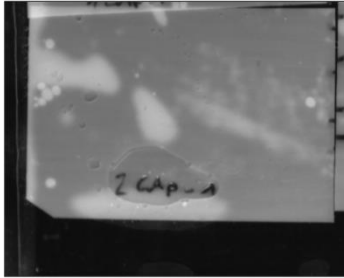

original marker picture  
GAPDH

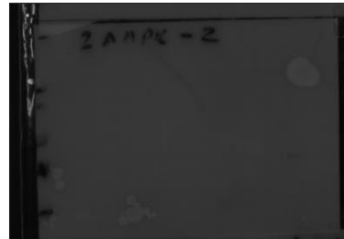

original marker picture

AMPK

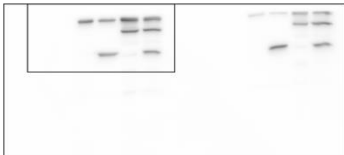

original western blot

Flag

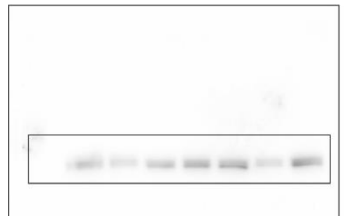

original marker picture

pAMPK (Thr172)

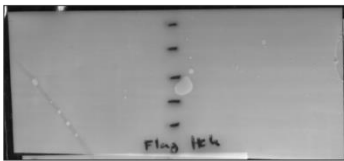

original marker picture  
Flag

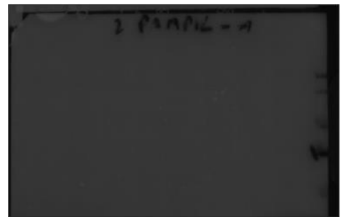

original western blot  
pAMPK (Thr172)

Replicate 2:

### Replicate 2

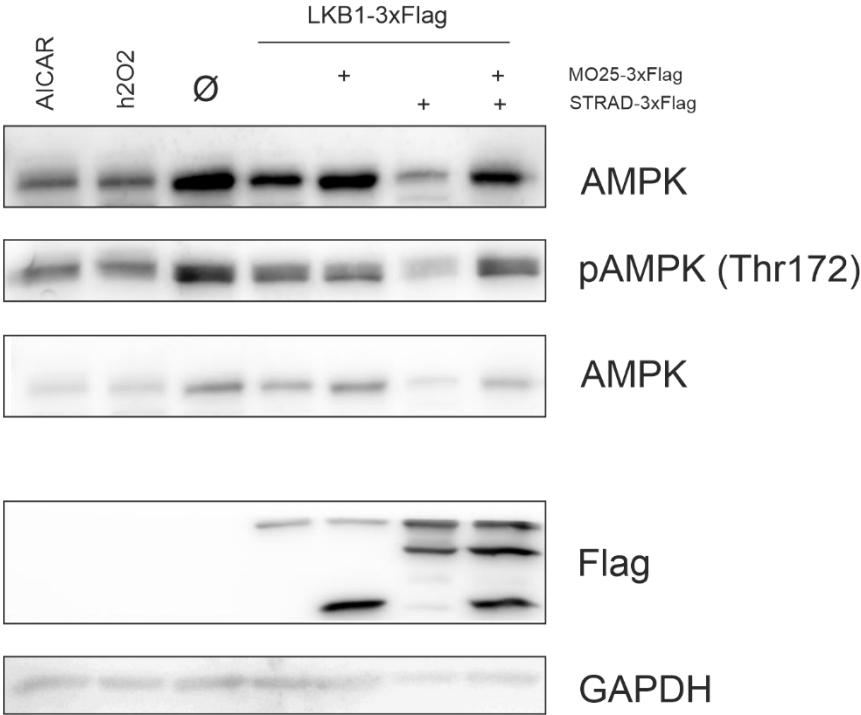

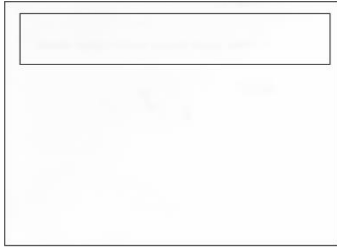

original western blot  
GAPDH

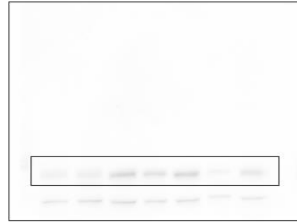

original western blot

AMPK

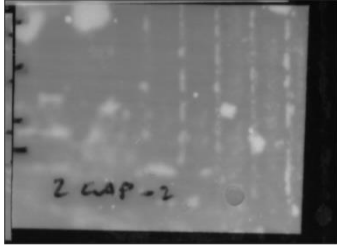

original marker picture

GAPDH

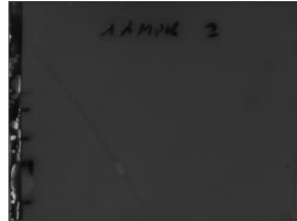

original marker picture

AMPK

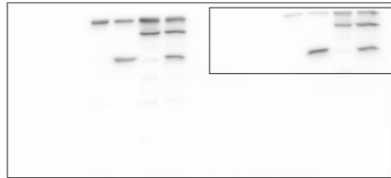

original western blot

Flag

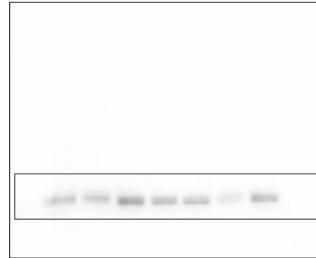

original western blot

pAMPK (Thr172)

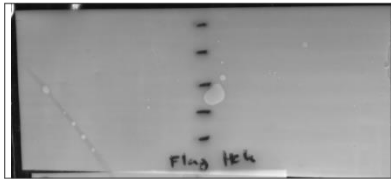

original marker picture

Flag

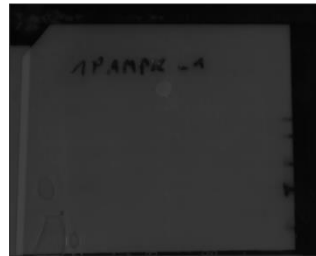

original marker picture

pAMPK (Thr172)

Replicate 3:

### Replicate 3

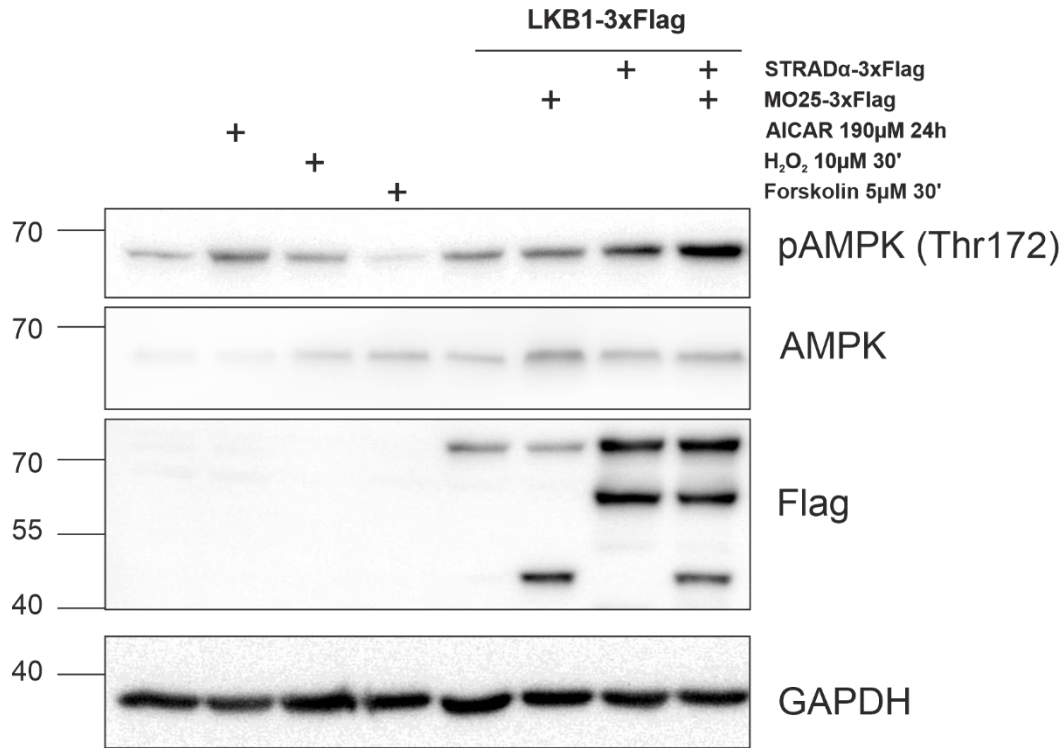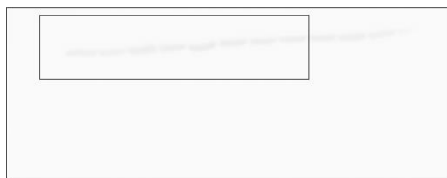

original western blot  
GAPDH

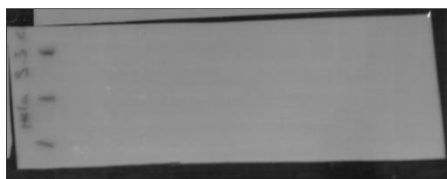

original marker picture  
GAPDH

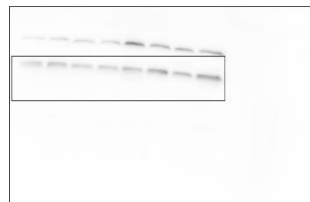

original western blot  
AMPK

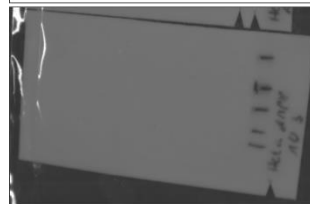

original marker picture  
AMPK

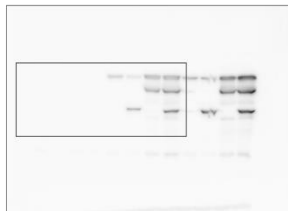

original western blot  
Flag

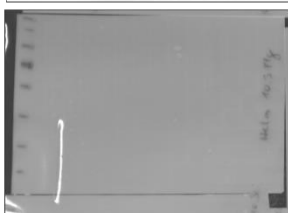

original marker picture  
Flag

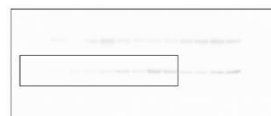

original western blot  
pAMPK (Thr172)

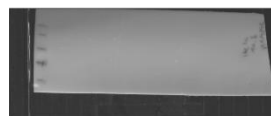

original marker picture  
pAMPK (Thr172)

Replicate 4:

### Replicate 4

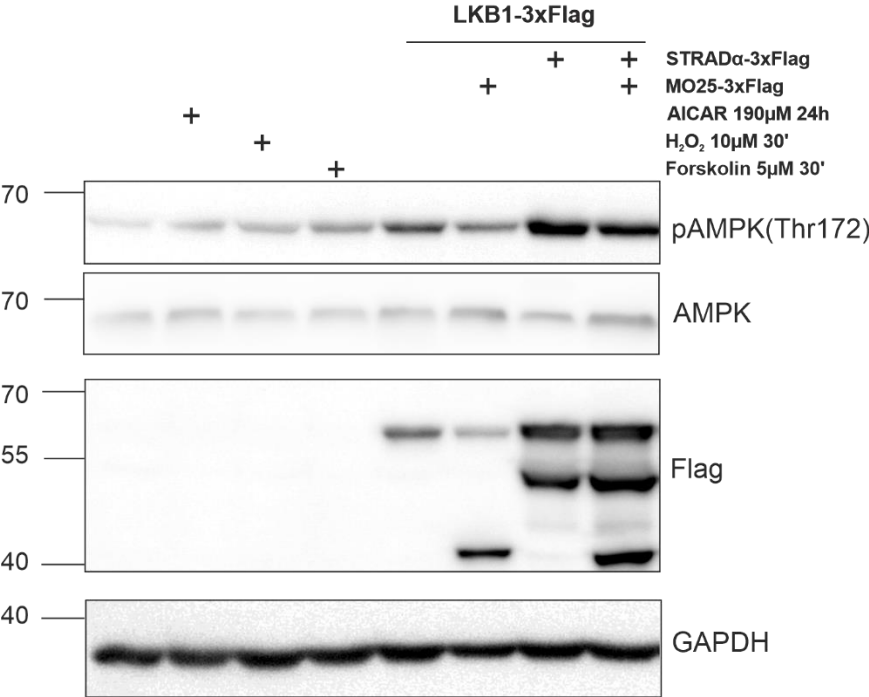

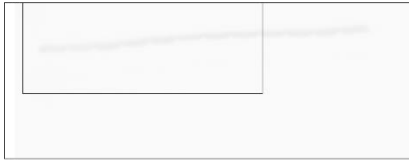

original western blot  
GAPDH

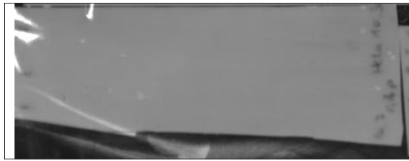

original marker picture  
GAPDH

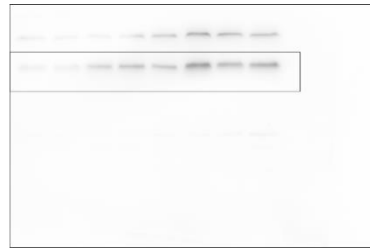

original western blot  
AMPK

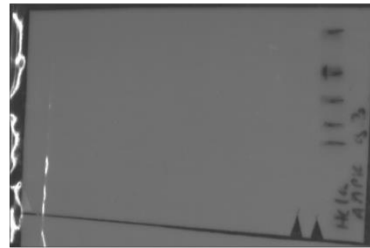

original marker picture  
AMPK

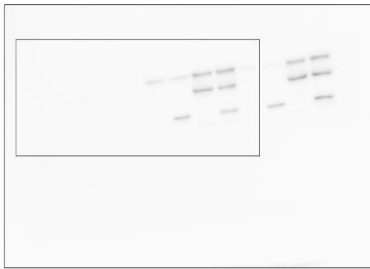

original western blot  
Flag

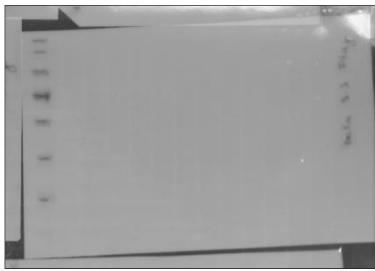

original marker picture  
Flag

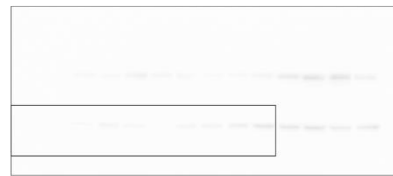

original western blot  
pAMPK (Thr172)

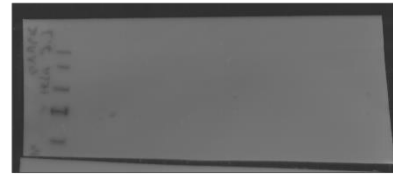

original marker picture  
pAMPK (Thr172)

**Figure 2 Panel E/F: Impact of LKB1-STRADα-MO25 co-expression on STRADα/LKB1 conformation**

In these panels representative western blots are shown. Since they were often detected on the same membranes panel E and F are shown here together. The corresponding western blot raw data is enclosed below :

Replicate 1F,1E, 2F:

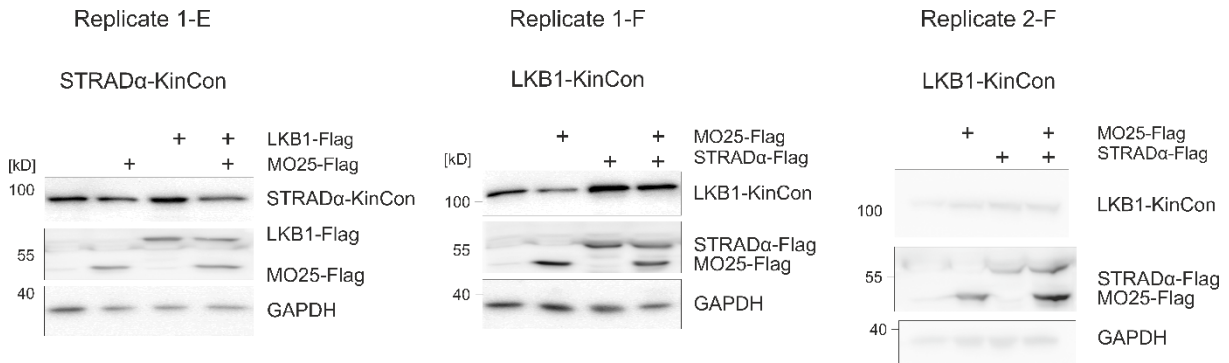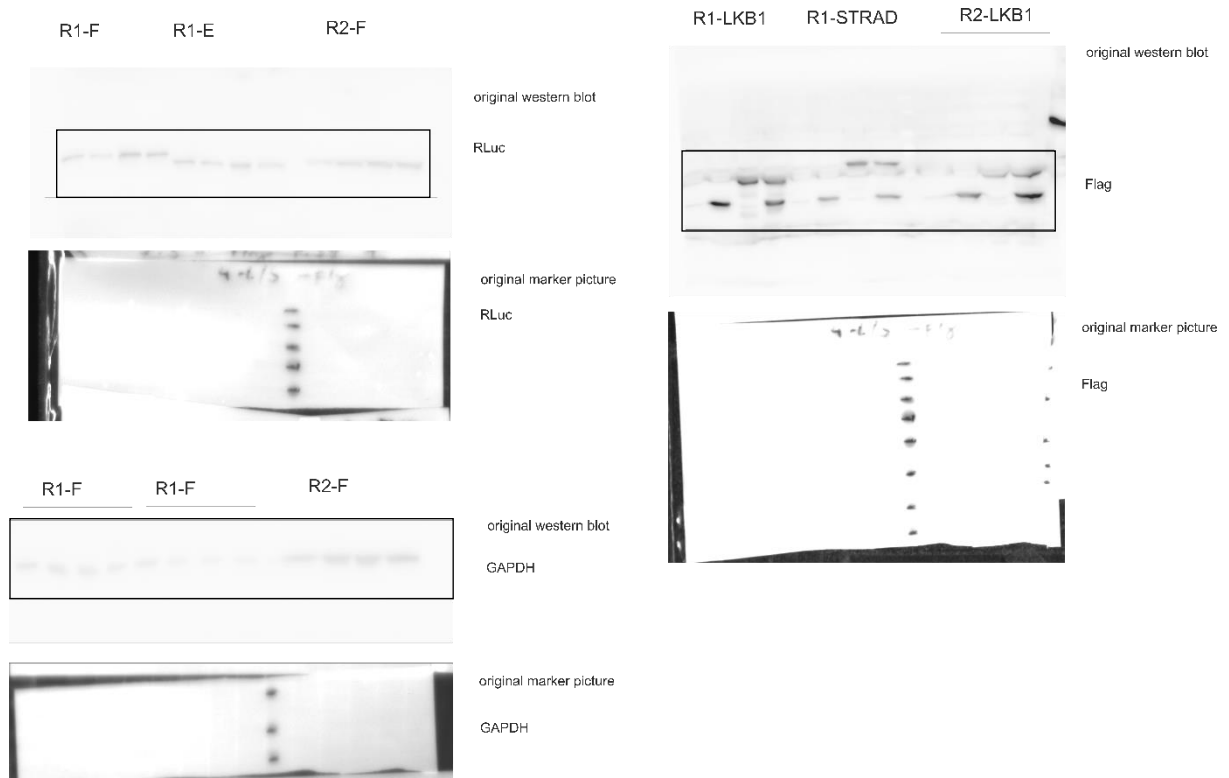



Replicate 3F,2E:

Replicate 2-E

STRAD $\alpha$ -KinCon

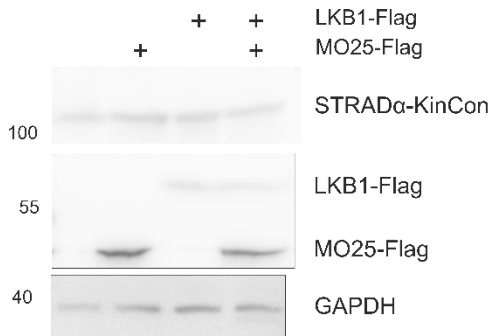

Replicate 3-F

LKB1-KinCon

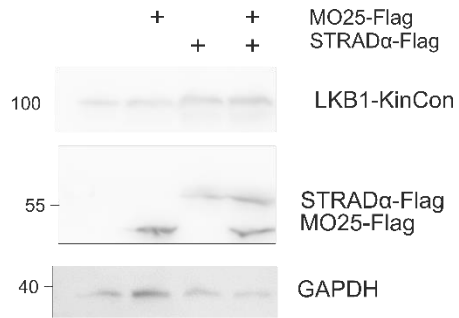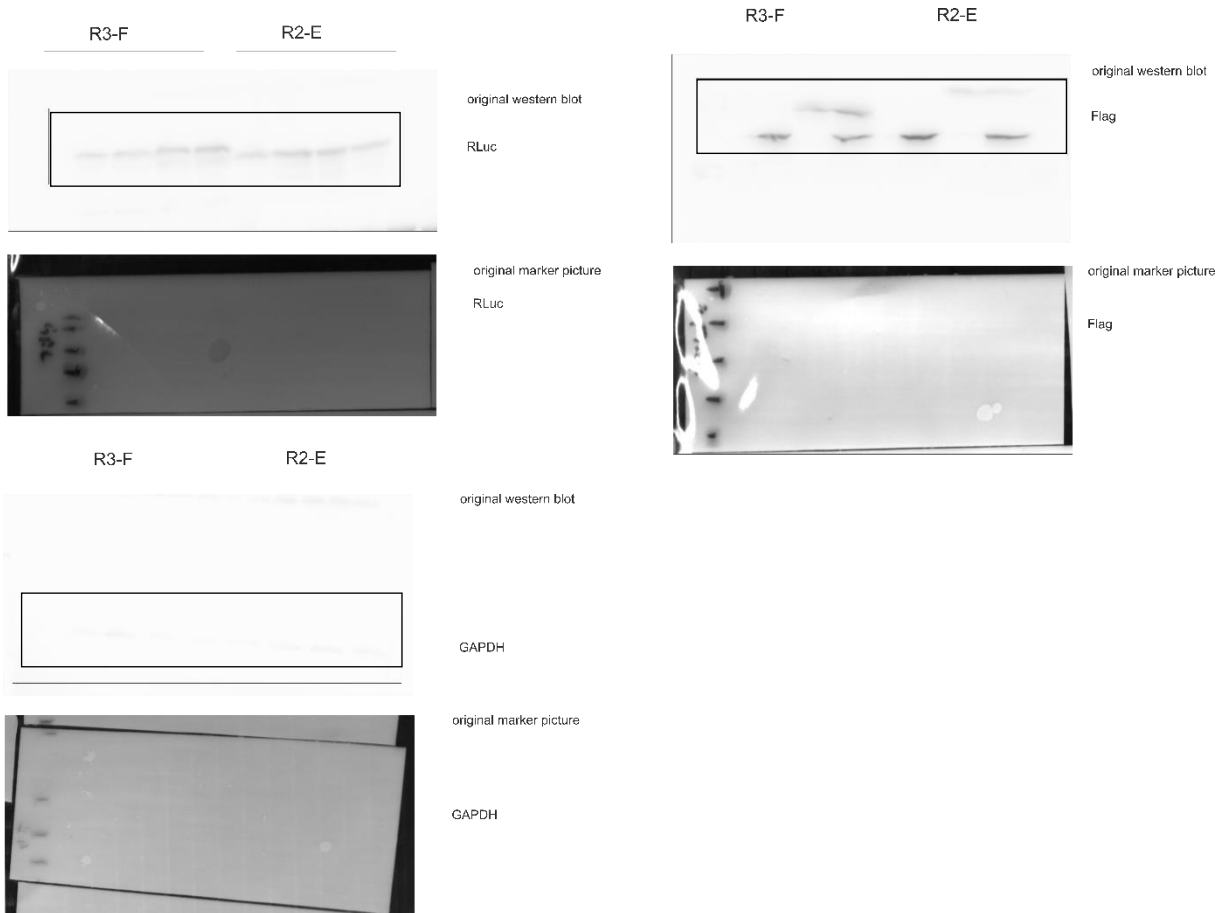

Replicate 3E:

Replicate 3-E

STRAD $\alpha$ -KinCon

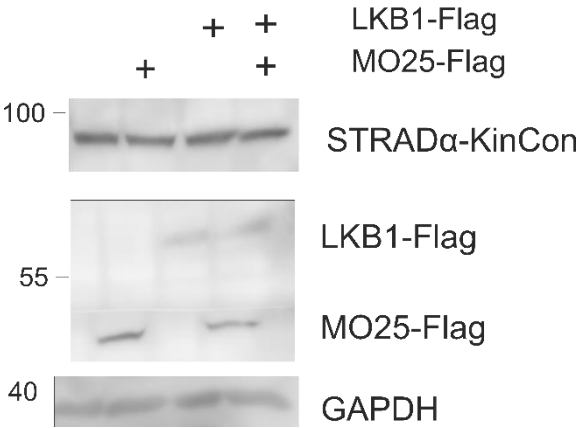

R3-E

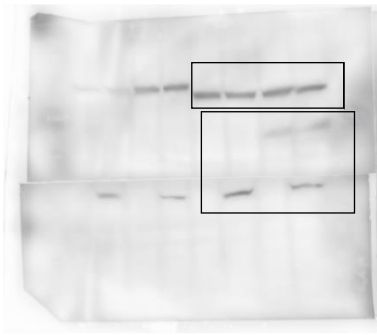

original western blot

RLuc

Flag

R3-E

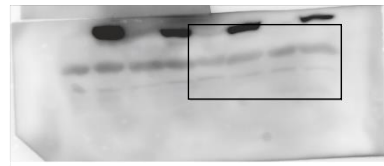

original western blot

GAPDH

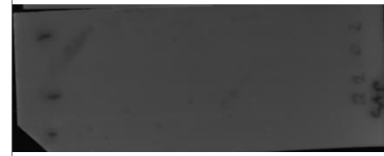

original marker picture

GAPDH

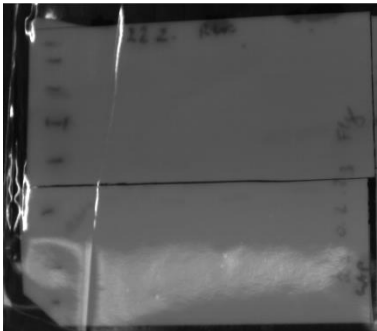

original marker picture

RLuc + Flag

Replicate 4F,4E:

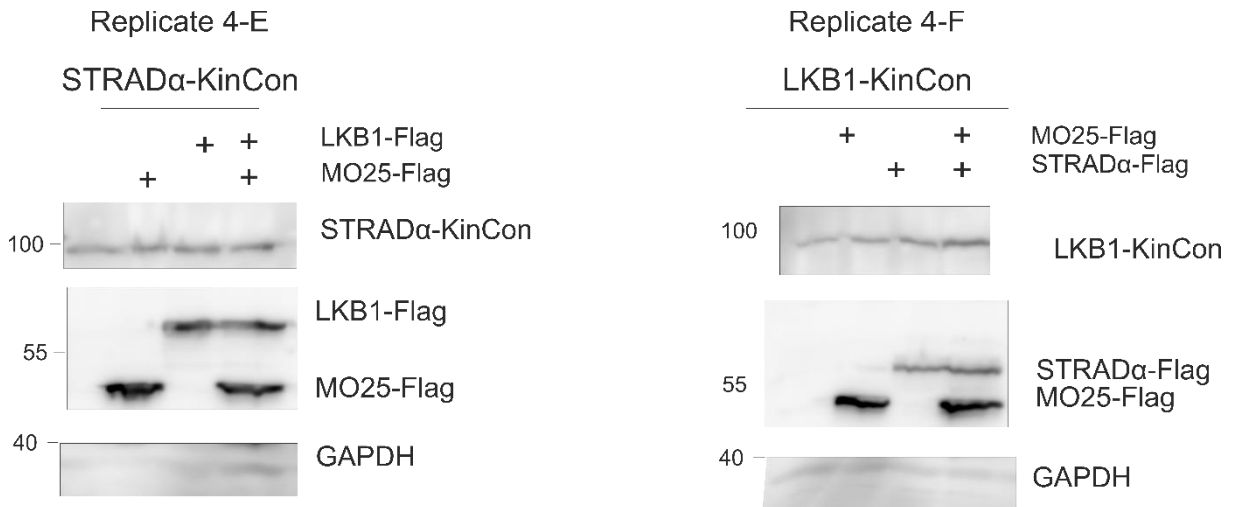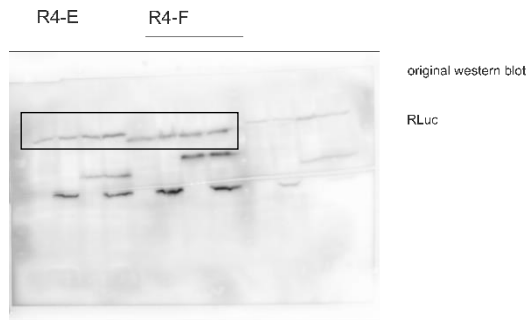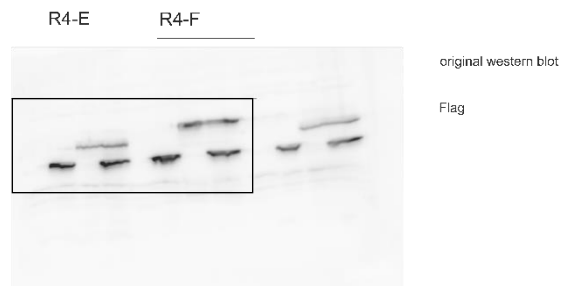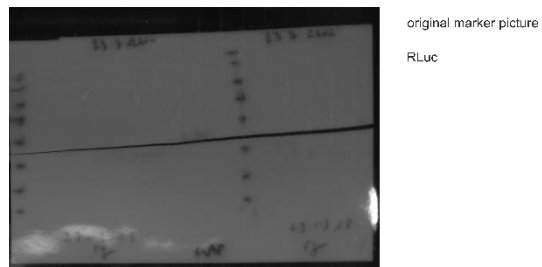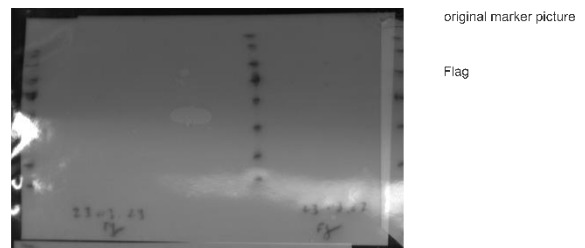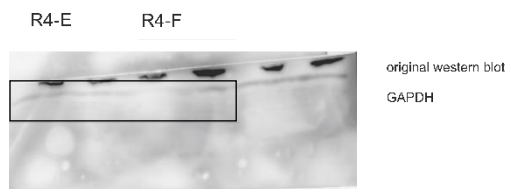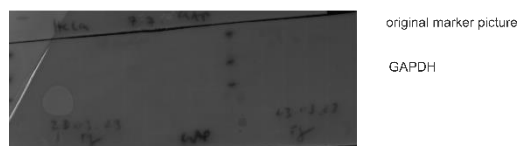

Replicate 5 -Figure E:

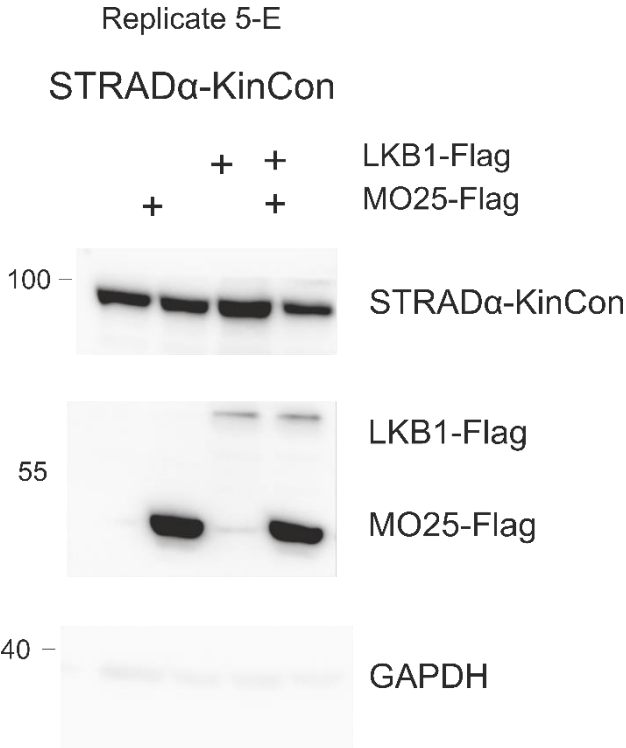

## R5-E

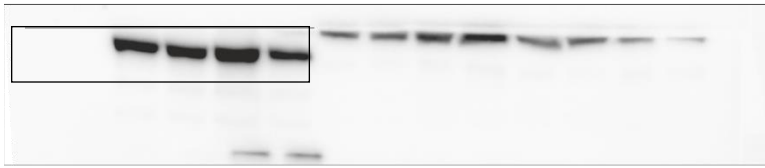

original western blot  
RLuc

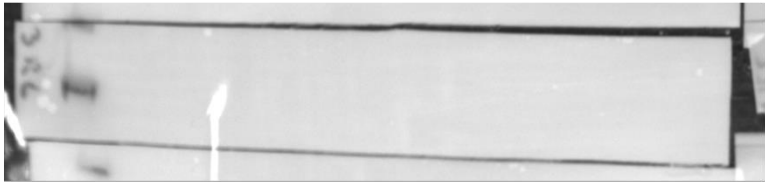

original marker picture  
RLuc

## R5-E

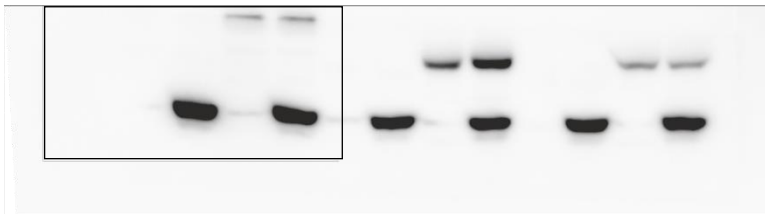

original western blot  
Flag

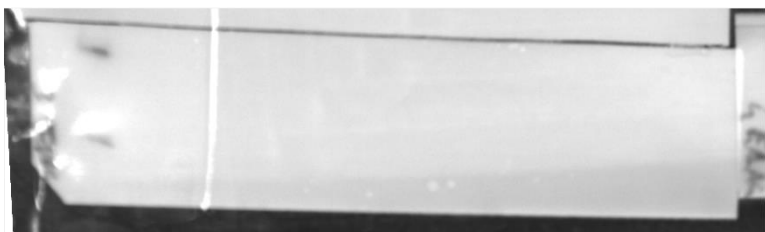

original marker picture  
Flag

## R5-E

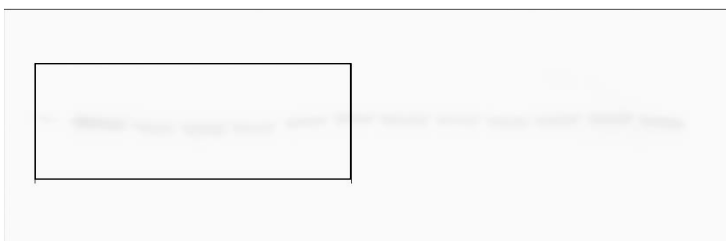

original western blot  
GAPDH

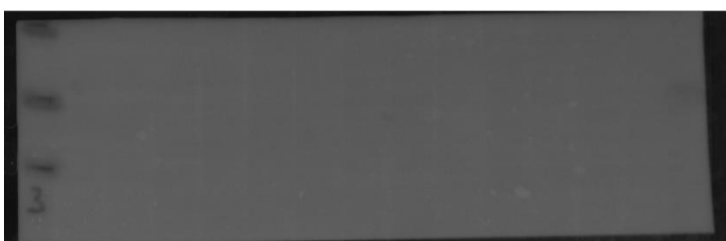

original marker picture  
GAPDH

**Figure 2 Panel G: Impact of STRADα-H231/F223A coexpression on LKB1 conformation**

In these panels representative western blots are shown. The corresponding western blot raw data is enclosed below and:

Replicate 1:

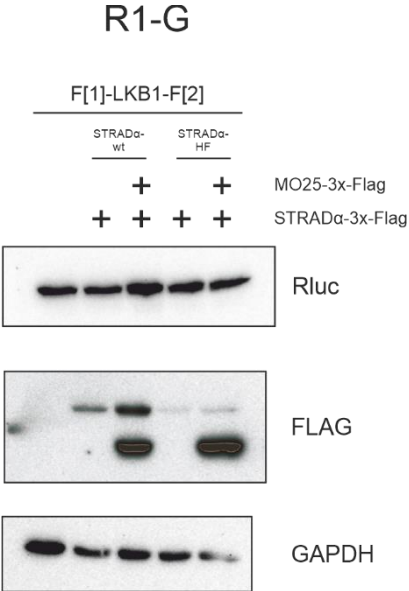

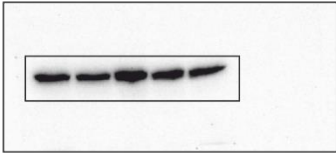

original western blot

RLuc

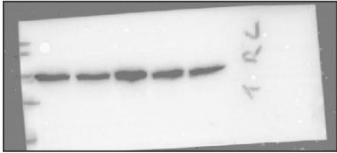

original marker picture

RLuc

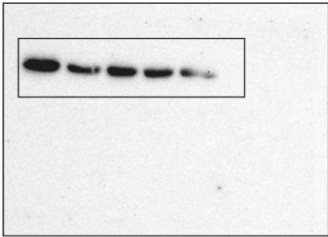

original western blot

GAPDH

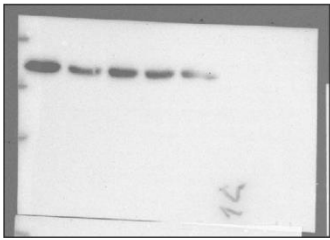

original marker picture

GAPDH

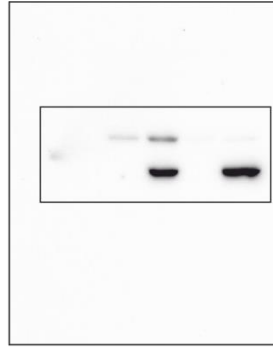

original western blot

Flag

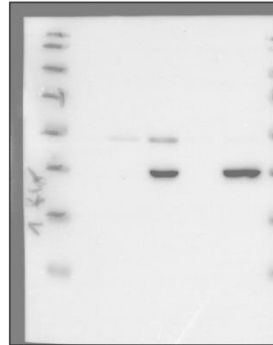

original marker picture

Flag



Replicate 2:

R2-G

F[1]-LKB1-F[2]

| STRAD $\alpha$ -wt |   | STRAD $\alpha$ -HF |   |
|--------------------|---|--------------------|---|
| +                  | + | +                  | + |
| +                  | + | +                  | + |

MO25-3x-Flag  
STRAD $\alpha$ -3x-Flag

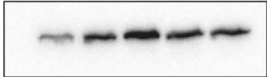

RLuc

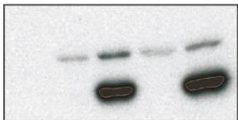

FLAG

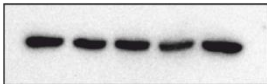

GAPDH

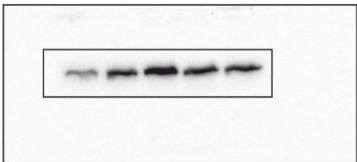

original western blot

RLuc

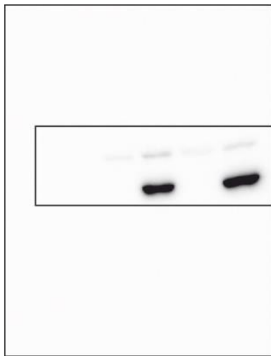

original western blot

Flag

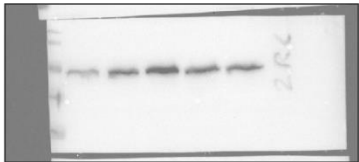

original marker picture

RLuc

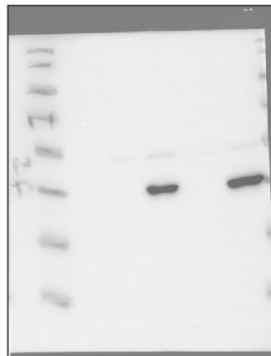

original marker picture

Flag

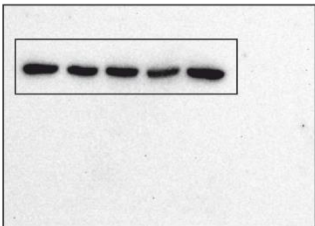

original western blot

GAPDH

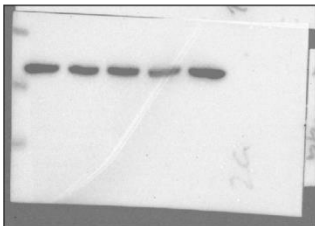

original marker picture

GAPDH

Replicate 3:  
R3-G

F[1]-LKB1-F[2]

| STRAD $\alpha$ -wt | STRAD $\alpha$ -HF |
|--------------------|--------------------|
| +                  | +                  |
| +                  | +                  |

|   |   |
|---|---|
| + | + |
| + | + |

MO25-3x-Flag

STRAD $\alpha$ -3x-Flag

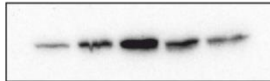

RLuc

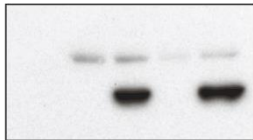

FLAG

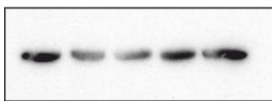

GAPDH

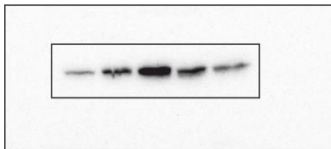

original western blot

RLuc

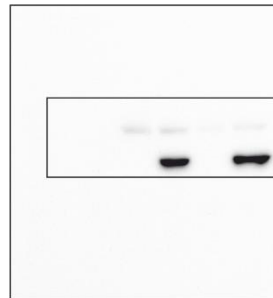

original western blot

Flag

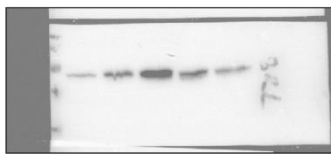

original marker picture

RLuc

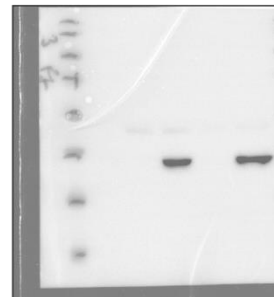

original marker picture

Flag

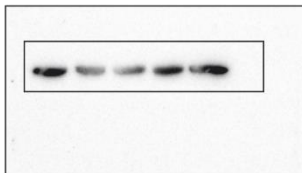

original western blot

GAPDH

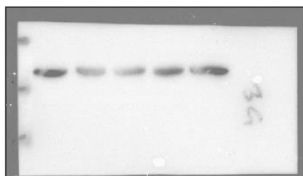

original marker picture

GAPDH

Replicate 4:  
R4-G

F[1]-LKB1-F[2]

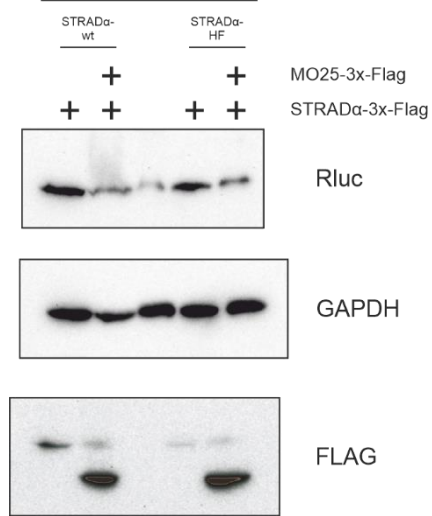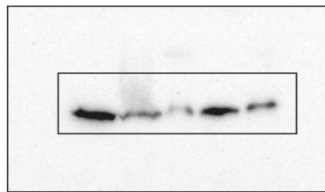

original western blot

RLuc

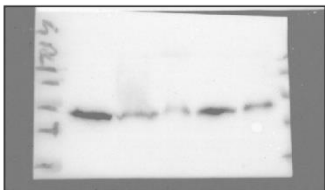

original marker picture

RLuc

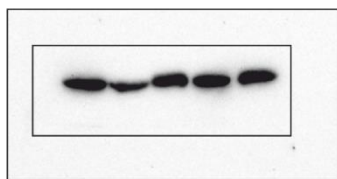

original western blot

GAPDH

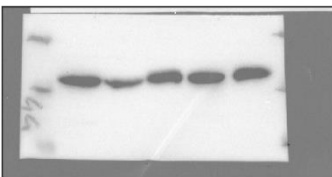

original marker picture

GAPDH

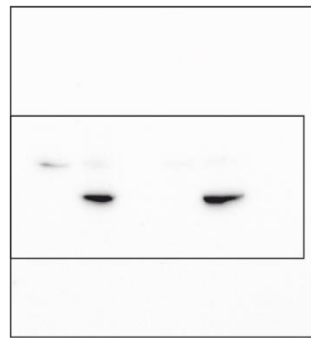

original western blot

Flag

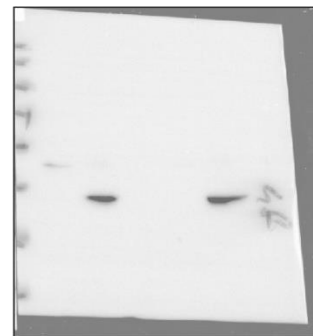

original marker picture

Flag

**Figure 2 Panel I: Impact of LKB1-mutants on the LKB1 conformation:**

In these panels representative western blots are shown. The corresponding western blot raw data is enclosed below :

Replicate1:

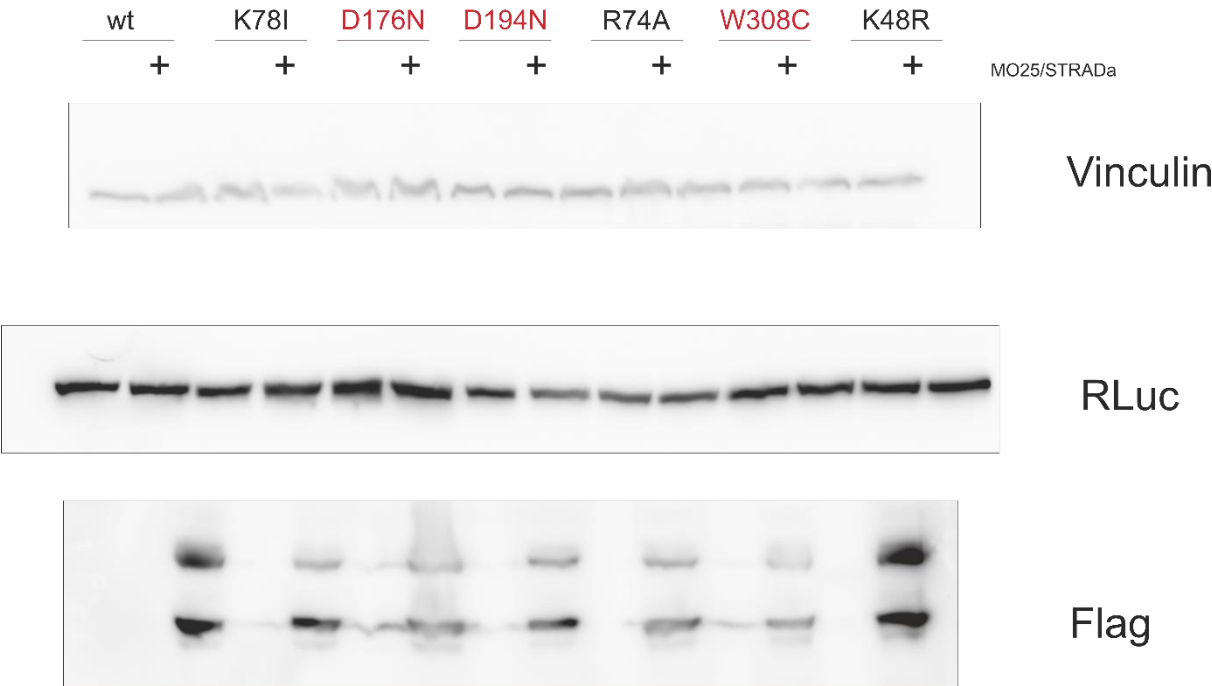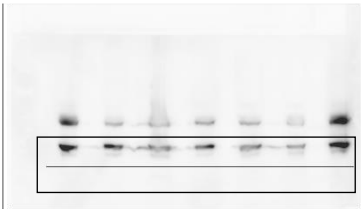

original western blot

Flag

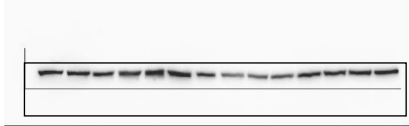

original western blot

RLuc

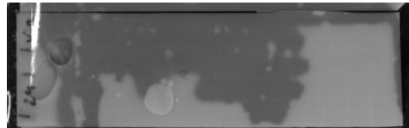

original marker picture

RLuc

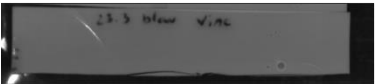

original marker picture

Vinculin

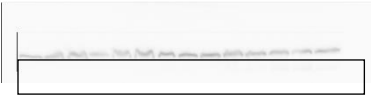

original western blot

Vinculin

For this replicate no marker picture was detected in the case of the Flag antibody

Replicate 2:

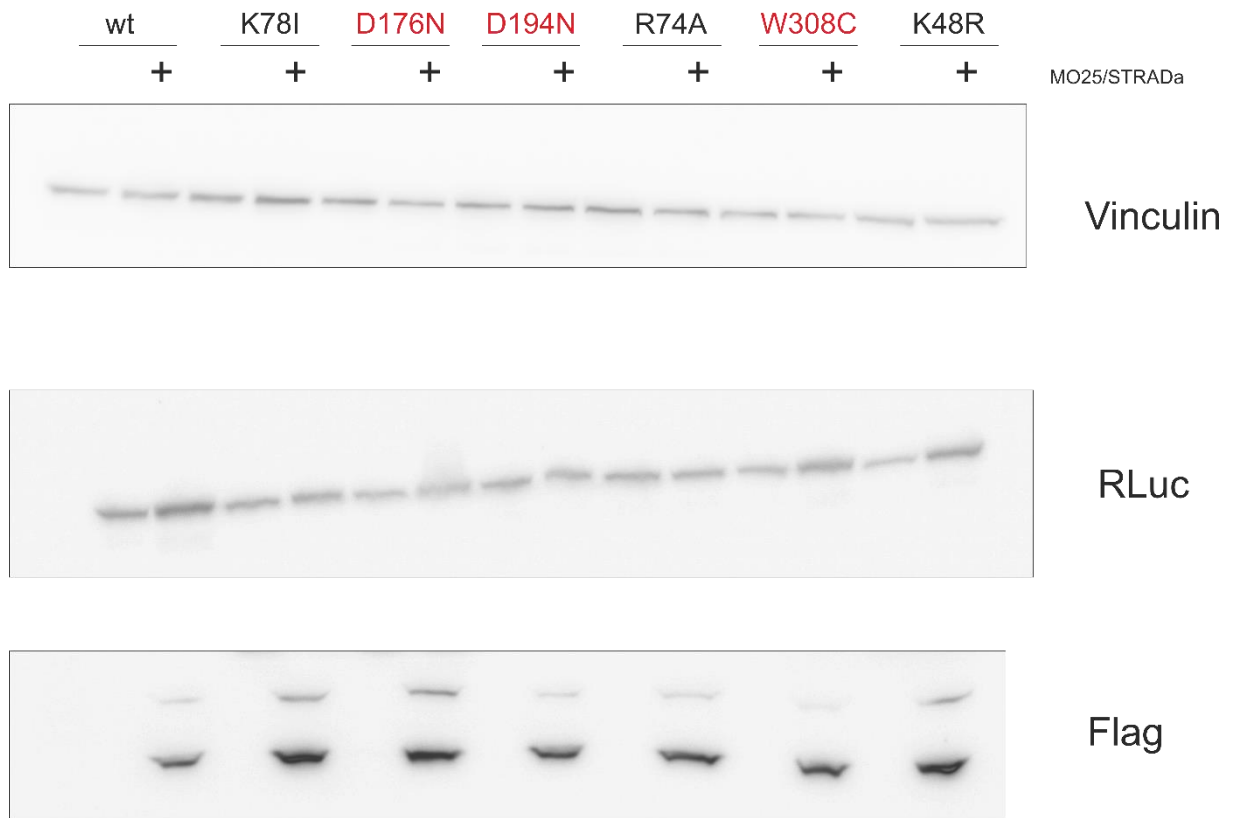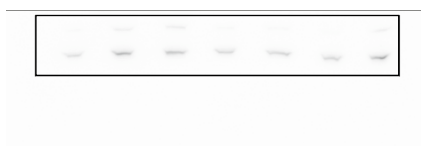

original western blot  
Flag

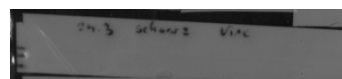

original marker picture  
Vinculin

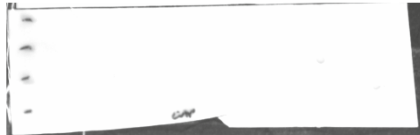

original marker picture  
Flag

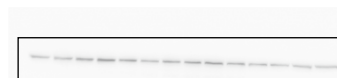

original western blot  
Vinculin

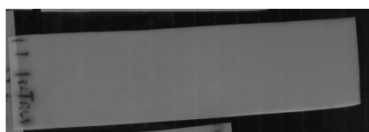

original marker picture  
RLuc

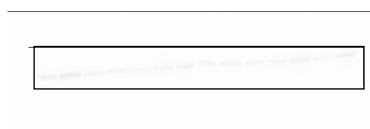

original western blot  
RLuc

# Replicate 3

reload of lysates of rep 3

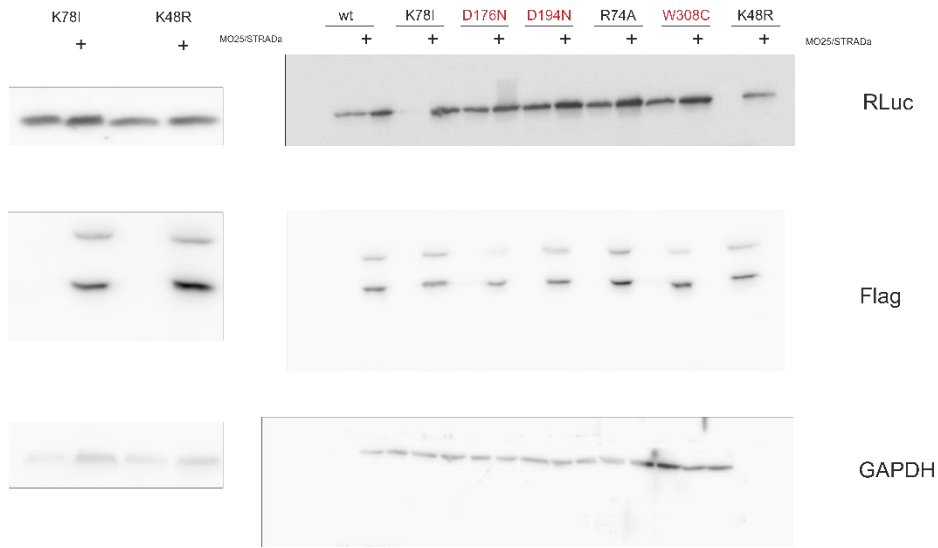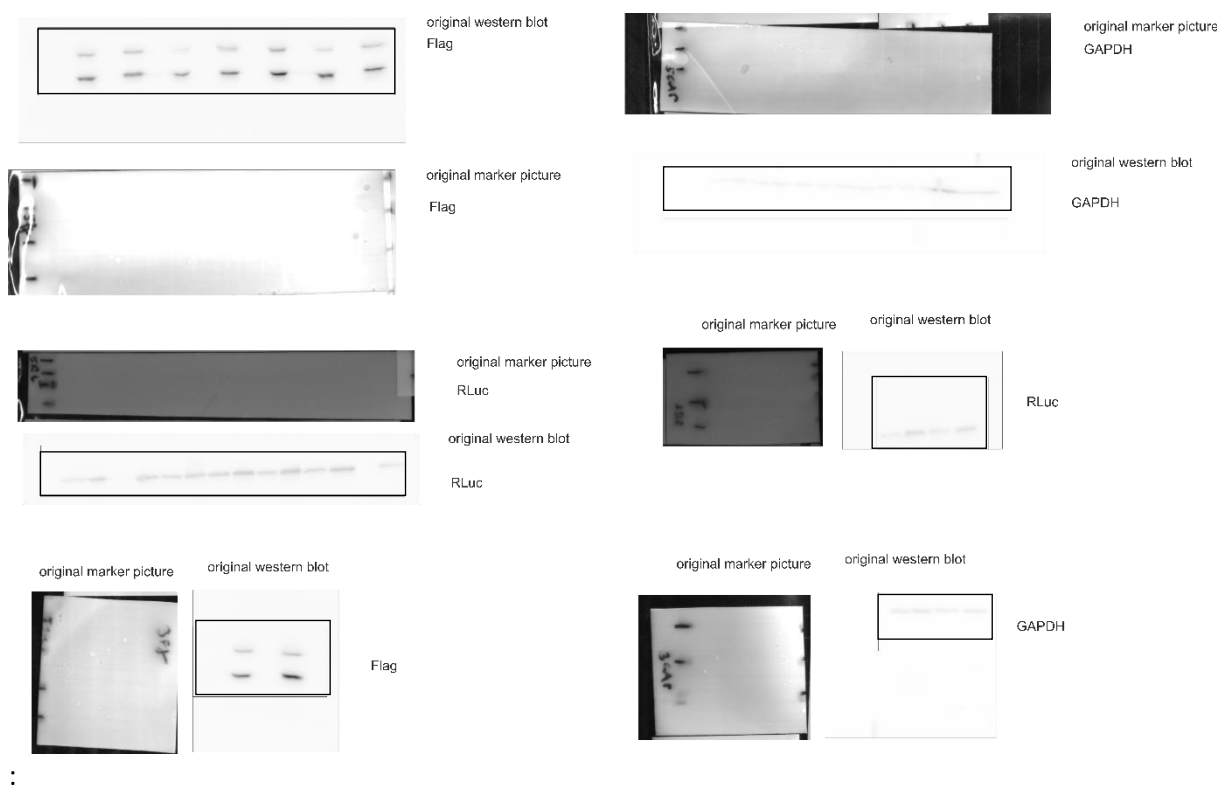

Replicate 4

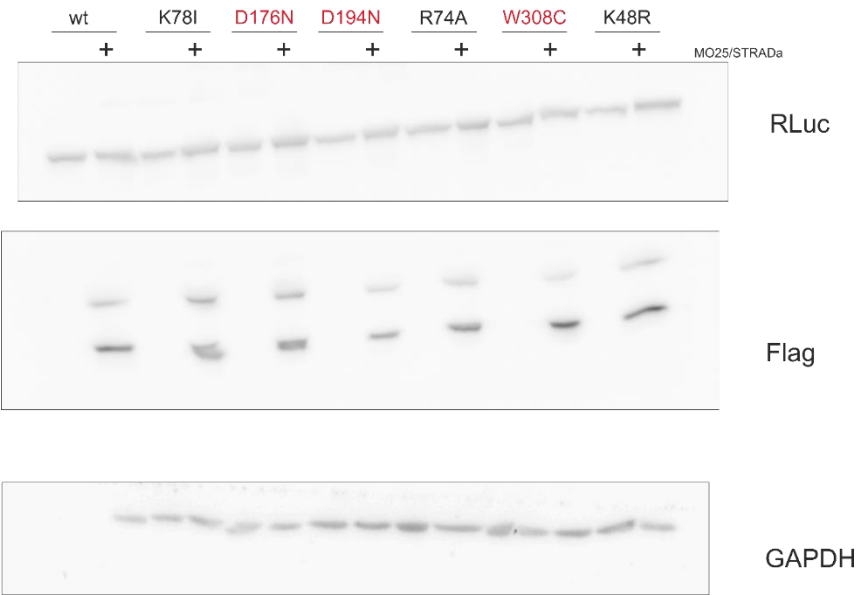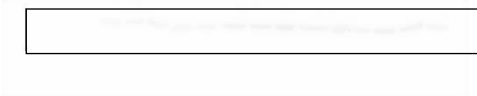

original western blot  
GAPDH

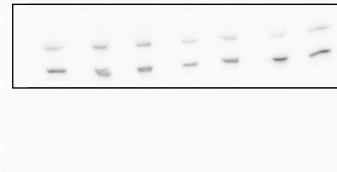

original western blot  
Flag

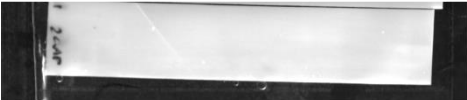

original marker picture  
GAPDH

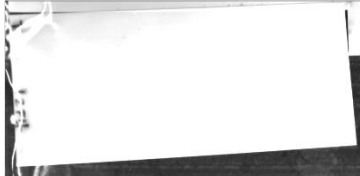

original marker picture  
Flag

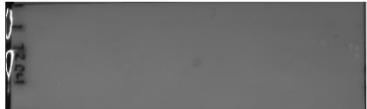

original marker picture  
RLuc

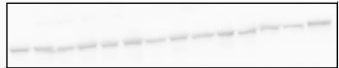

original western blot  
RLuc

Replicate 5:

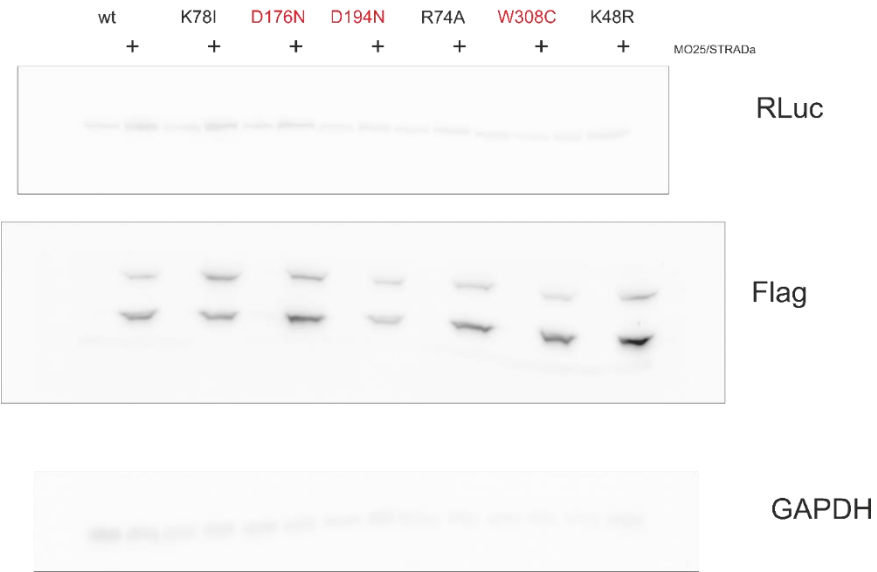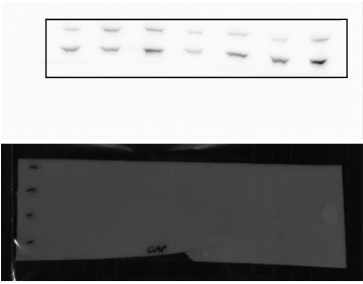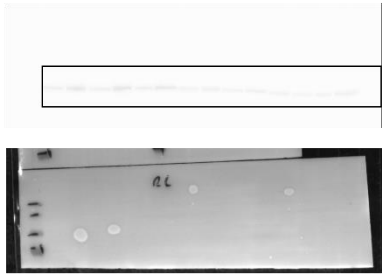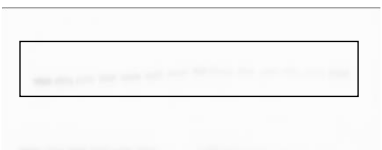

No marker was detected for GAPDH in R5
