# Supplementary material for: Impact of protein and small molecule interactions on kinase conformations
Source: eLife journal article supplement (doi:10.7554/elife.94755), 2024-02-20
Supplement: fig2-figsupp1-data2 [file elife-94755-fig2-figsupp1-data2-v1.pdf]

**Figure 2 – Figure Supplement 1:** Complex formation of LKB1/STRADa/MO25 in HeLa and SW480 cells

In these panels representative western blots are shown. The corresponding western blot raw data is enclosed blow:

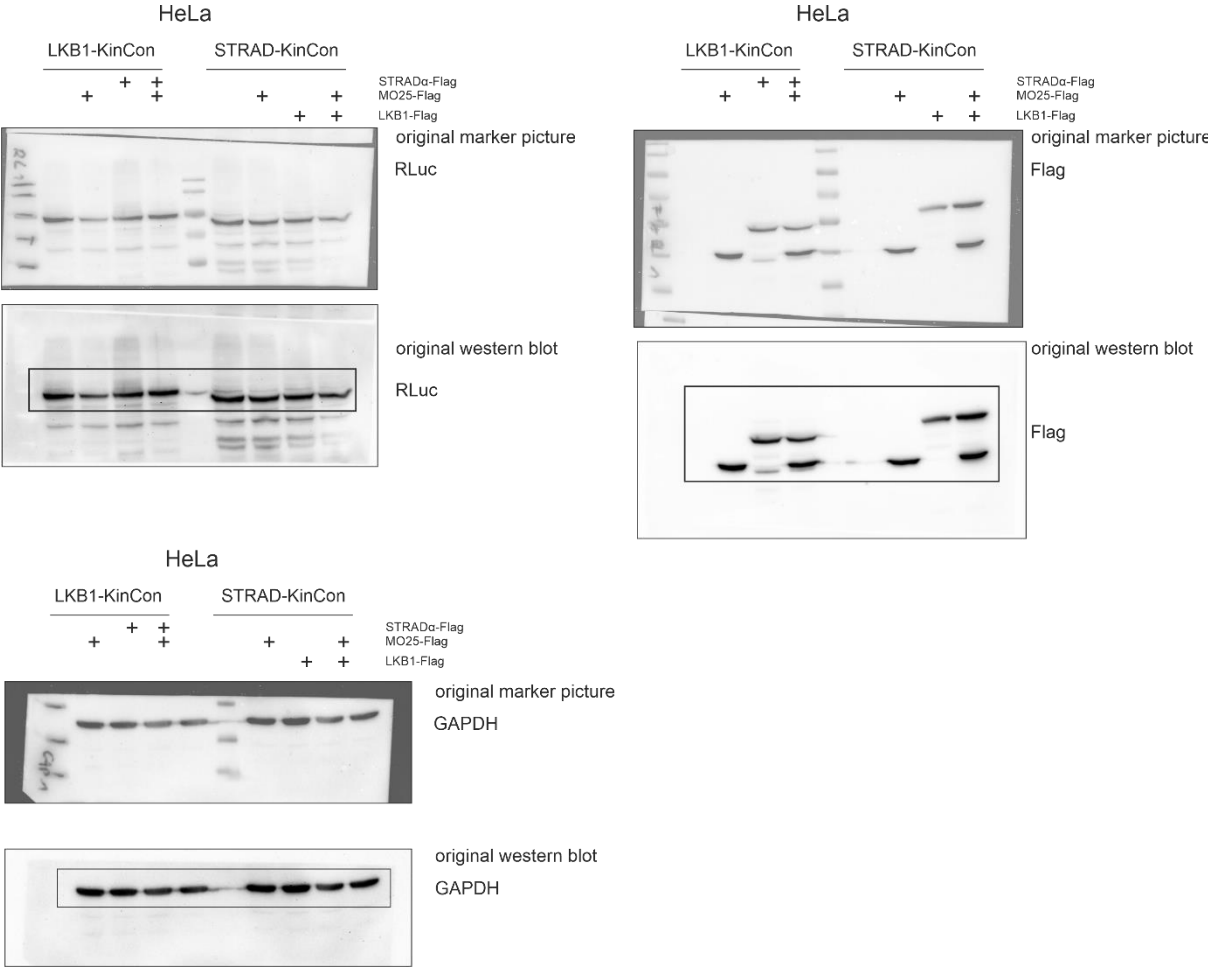

SW480

| LKB1-KinCon |   |   | STRAD-KinCon |   |   |
|-------------|---|---|--------------|---|---|
|             | + | + |              | + | + |
|             |   | + |              |   | + |
|             |   |   |              |   | + |

STRAD $\alpha$ -Flag  
MO25-Flag  
LKB1-Flag

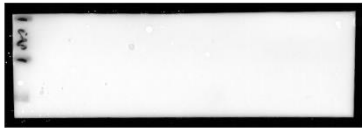

original marker picture  
GAPDH

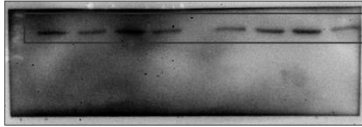

original western blot  
GAPDH

SW480

| LKB1-KinCon |   |   | STRAD-KinCon |   |   |
|-------------|---|---|--------------|---|---|
|             | + | + |              | + | + |
|             |   | + |              |   | + |
|             |   |   |              |   | + |

STRAD $\alpha$ -Flag  
MO25-Flag  
LKB1-Flag

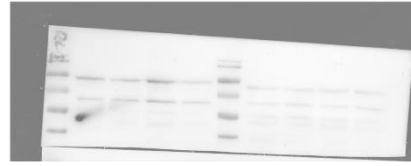

original marker picture  
RLuc

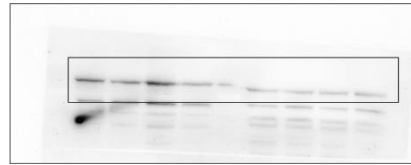

original western blot  
RLuc

SW480

| LKB1-KinCon |   |   | STRAD-KinCon |   |   |
|-------------|---|---|--------------|---|---|
|             | + | + |              | + | + |
|             |   | + |              |   | + |
|             |   |   |              |   | + |

STRAD $\alpha$ -Flag  
MO25-Flag  
LKB1-Flag

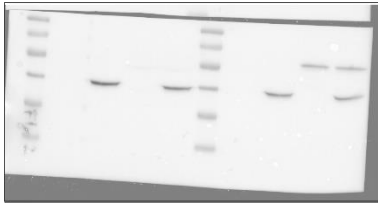

original marker picture  
Flag

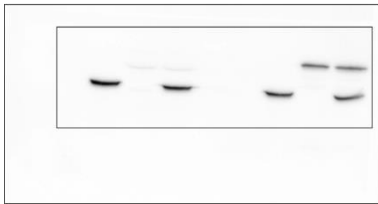

original western blot  
Flag
