# Supplementary material for: Impact of protein and small molecule interactions on kinase conformations
Source: eLife journal article supplement (doi:10.7554/elife.94755), 2024-02-20

Indicated antibodies have been used (for details see the Materials and Methods section)

**Figure 3 – Figure Supplement 2 panel B**

RIPK1 phosphorylation

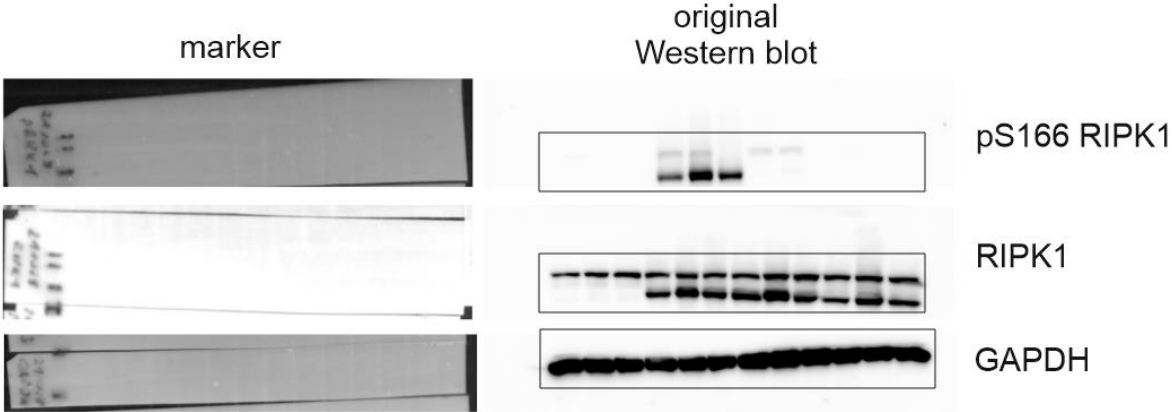

Supplement: fig3-figsupp2-data2 [file elife-94755-fig3-figsupp2-data2-v1.pdf]
