# Supplementary material for: Impact of protein and small molecule interactions on kinase conformations
Source: eLife journal article supplement (doi:10.7554/elife.94755), 2024-02-20
Supplement: fig4-data2 [file elife-94755-fig4-data2-v1.pdf]

Indicated antibodies have been used (for details see the Materials and Methods section)

**Figure 4 panel E**

Basal signals of CDK4/6 KinCon.

In this panel one representative western blot is shown.

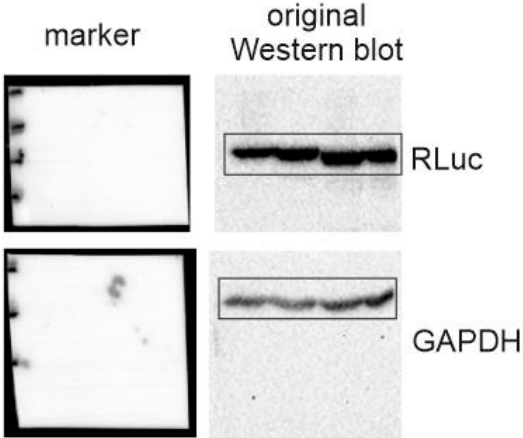

**Figure 4 panel F**

CDK4/6 KinCon reporters with inhibitor treatment.

In this panel one representative western blot is shown. The marked rectangles represent the shown lanes.

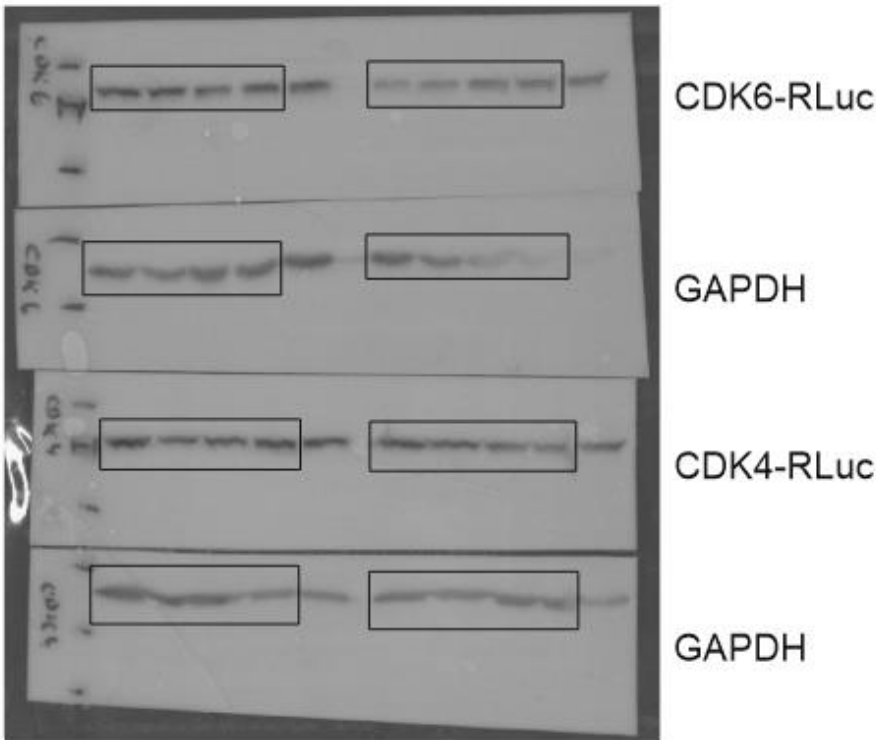

overlay of marker and original western blot
