# Supplementary material for: Impact of protein and small molecule interactions on kinase conformations
Source: eLife journal article supplement (doi:10.7554/elife.94755), 2024-02-20

Indicated antibodies have been used (for details see the Materials and Methods section)

**Figure 4 – Figure Supplement 1**

CDK4/6 PPI with p16<sup>INK4a</sup>.

In this panel one representative western blot is shown. The marked rectangles represent the shown lanes.

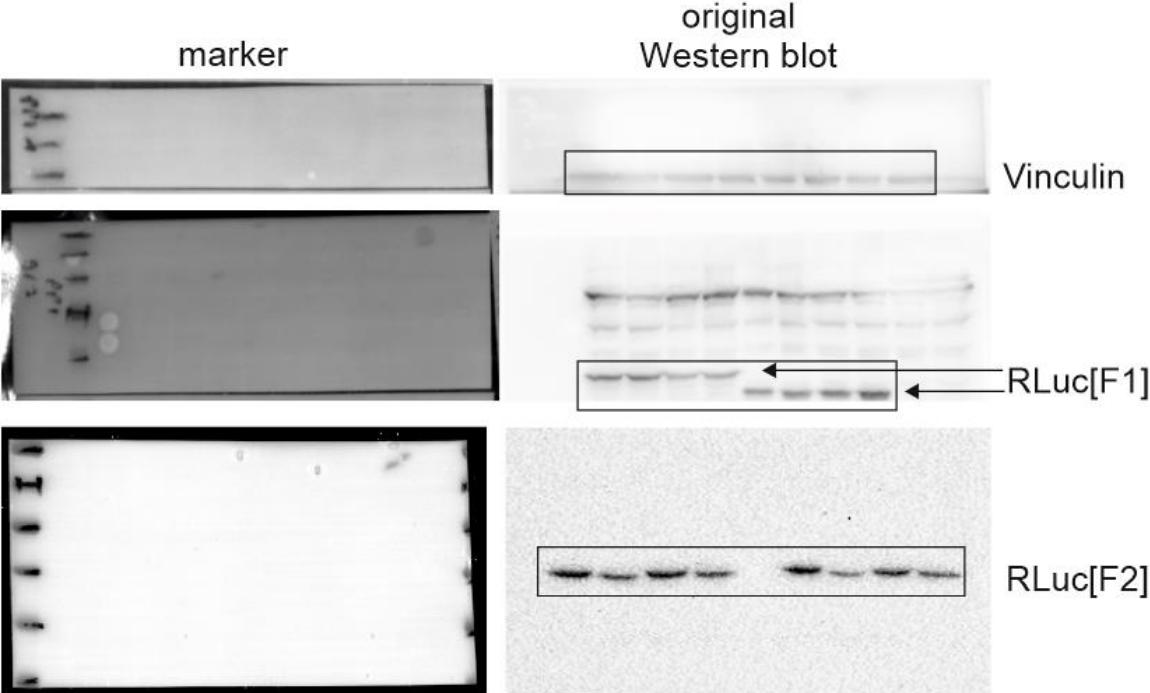

Supplement: fig4-figsupp1-data2 [file elife-94755-fig4-figsupp1-data2-v1.pdf]
