# Supplementary material for: Impact of protein and small molecule interactions on kinase conformations
Source: eLife journal article supplement (doi:10.7554/elife.94755), 2024-02-20
Supplement: fig5-figsupp1-data2 [file elife-94755-fig5-figsupp1-data2-v1.pdf]

Indicated antibodies have been used (for details see the Materials and Methods section)

**Figure 5 – Figure Supplement 1 panel A:**

Subcellular localization of PKAc and BRAF KinCon reporters.

N stands for nucleus and C stands for cytoplasm.

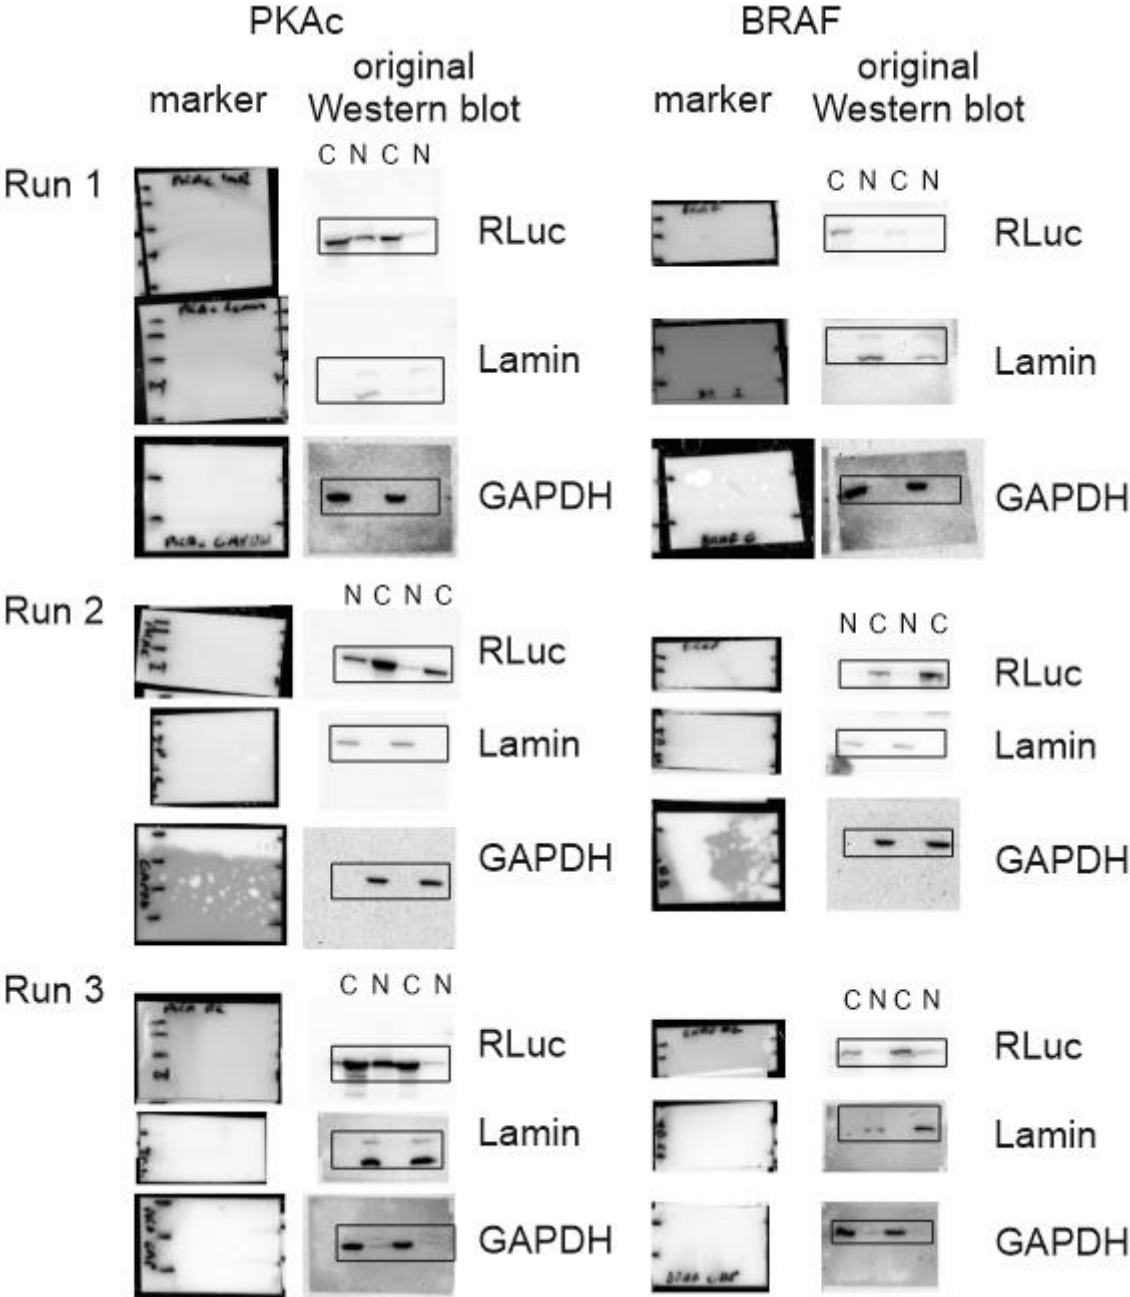

marker

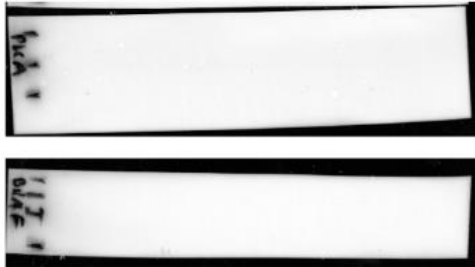

original  
Western blot

Run 1    Run 2    Run 3  
C N C N    N C N C    C N C N

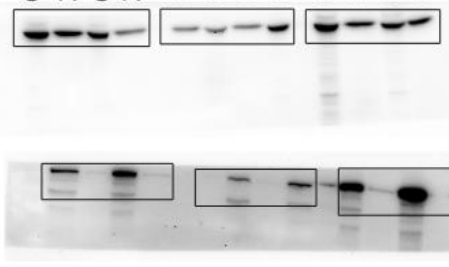

PKAc  
endogenous

BRAF  
endogenous
